# Supplementary material for: From pipemidic acid molecular salts to metal complexes and BioMOFs using mechanochemistry
Source: Royal Society of Chemistry journal article supplement (doi:10.1039/d0ce01533d), 2020-12-23
Supplement: d0ce01533d1.pdf [file d0ce01533d1.pdf]

## SUPPORTING INFORMATION

# From pipemidic acid molecular salts to metal complexes and BioMOFs using Mechanochemistry

*Martin Zábbransky<sup>a,b</sup>, Paula C. Alves<sup>a,c</sup>, Catarina Bravo<sup>a,c</sup>, M. Teresa Duarte<sup>a,d\*</sup>, Vânia André<sup>a,c\*</sup>*

a) Centro de Química Estrutural, Instituto Superior Técnico, Universidade de Lisboa, Av. Rovisco Pais, 1049-001 Lisboa, Portugal; b) Department of Inorganic Chemistry, Faculty of Science, Charles University, Hlavova 2030, 128 40 Prague, Czech Republic; c) Associação do Instituto Superior Técnico para a Investigação e Desenvolvimento (IST-ID), Av. Rovisco Pais, 1049-003 Lisboa, Portugal; d) Departamento de Engenharia Química, Instituto Superior Técnico, Universidade de Lisboa, Av. Rovisco Pais, 1049-001 Lisboa, Portugal

### Structural data

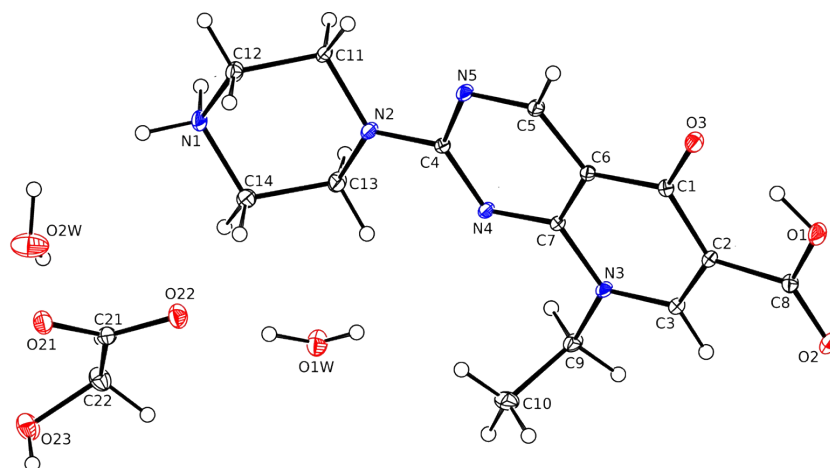

**Figure S1.** Asymmetric unit in  $1 \cdot 2\text{H}_2\text{O}$ . Thermal displacement ellipsoids are plotted at 30 % probability level.

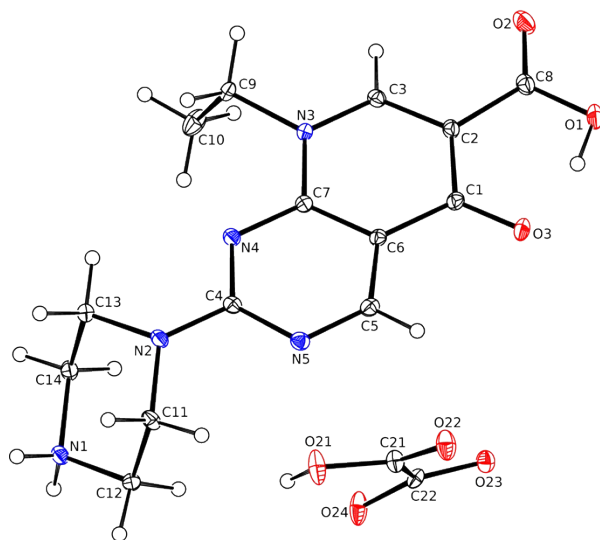

**Figure S2.** Asymmetric unit in **2**. Thermal displacement ellipsoids are plotted at 30 % probability level.

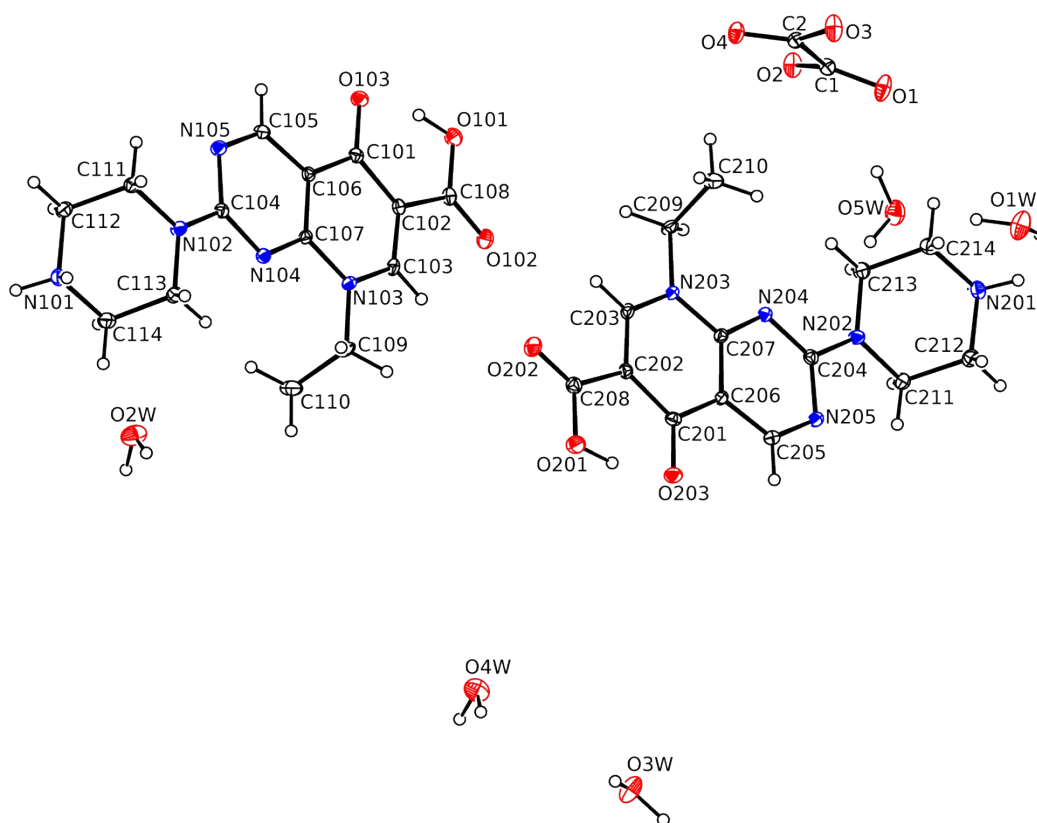

**Figure S3.** Asymmetric unit in **3·5H<sub>2</sub>O**. Thermal displacement ellipsoids are plotted at 30 % probability level.

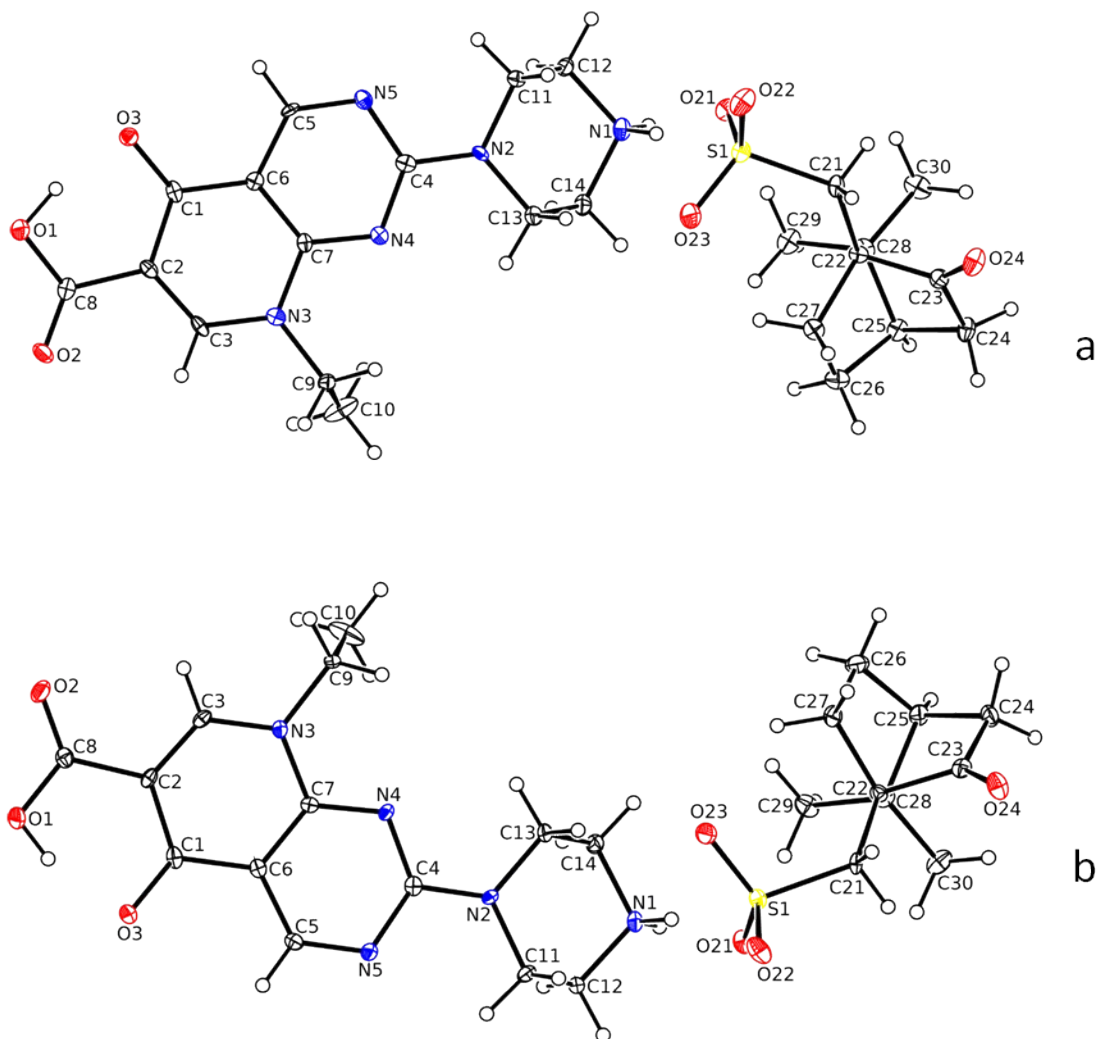

**Figure S4.** Asymmetric units of (a) **4S** and (b) **4R**. Thermal displacement ellipsoids are plotted at 30 % probability level.

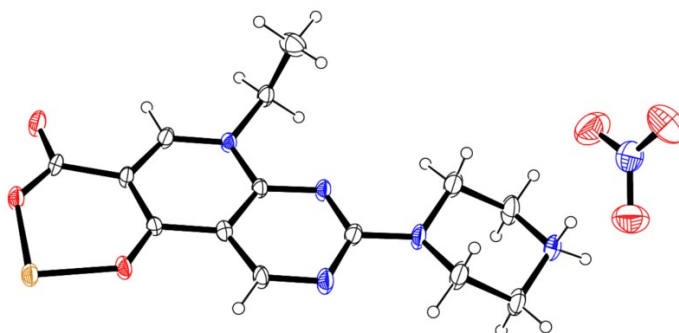

**Figure S5.** Asymmetric units of **5**. Thermal displacement ellipsoids are plotted at 30 % probability level.

**Table S1.** Selected bond lengths (Å) and angles (°) for **1**·2H<sub>2</sub>O.

|         |          |                 |          |
|---------|----------|-----------------|----------|
| C1-O3   | 1.269(1) | C2-C1-O3        | 122.5(1) |
| C8-O1   | 1.336(2) | C2-C8-O1        | 114.3(1) |
| C8-O2   | 1.209(2) | C2-C8-O2        | 124.4(1) |
| C21-O21 | 1.252(2) | O1-C8-O2        | 121.3(1) |
| C21-O22 | 1.263(1) | C7-N3-C9-C10    | -76.3(1) |
| C21-C22 | 1.523(2) | C1-C2-C8-O1     | -1.1(2)  |
| C22-O23 | 1.412(2) | C1-C2-C8-O2     | 178.5(1) |
|         |          | O23-C22-C21-O22 | 156.7(1) |

**Table S2.** Selected bond lengths (Å) and angles (°) for **2**.

|         |          |                 |           |
|---------|----------|-----------------|-----------|
| C1-O3   | 1.258(2) | C2-C1-O3        | 122.6(1)  |
| C8-O1   | 1.328(2) | C2-C8-O1        | 114.9(2)  |
| C8-O2   | 1.214(2) | C2-C8-O2        | 123.5(2)  |
| C21-O21 | 1.326(2) | O1-C8-O2        | 121.6(2)  |
| C21-O22 | 1.201(2) | C7-N3-C9-C10    | -87.6(2)  |
| C22-O23 | 1.242(2) | C1-C2-C8-O1     | 1.1(2)    |
| C22-O24 | 1.248(2) | C1-C2-C8-O2     | -178.2(2) |
| C21-C22 | 1.551(2) | O23-C22-C21-O21 | 169.2(2)  |

**Table S3.** Selected bond lengths (Å) and angles (°) for **3**·5H<sub>2</sub>O.

|           |          |                     |           |
|-----------|----------|---------------------|-----------|
| C101-O103 | 1.256(2) | C102-C101-O103      | 122.9(2)  |
| C108-O101 | 1.323(2) | C102-C108-O101      | 116.0(2)  |
| C108-O102 | 1.214(2) | C102-C108-O102      | 123.1(2)  |
| C201-O203 | 1.262(2) | O101-C108-O102      | 121.0(2)  |
| C208-O201 | 1.327(2) | C202-C201-O203      | 122.9(2)  |
| C208-O202 | 1.210(2) | C202-C208-O201      | 114.5(2)  |
| C1-O1     | 1.238(2) | C202-C208-O202      | 124.1(2)  |
| C1-O2     | 1.260(2) | O201-C208-O202      | 121.5(2)  |
| C2-O3     | 1.255(2) | C107-N103-C109-C110 | 76.1(2)   |
| C2-O4     | 1.243(2) | C101-C102-C108-O101 | 1.0(2)    |
| C1-C2     | 1.552(2) | C101-C102-C108-O102 | -178.6(1) |
|           |          | C207-N203-C209-C210 | -83.3(2)  |
|           |          | C201-C202-C208-O201 | -0.4(2)   |
|           |          | C201-C202-C208-O202 | 179.5(1)  |
|           |          | O1-C1-C2-O4         | -164.1(2) |

**Table S4.** Selected bond lengths (Å) and angles (°) for **4S**.

|        |          |                |           |
|--------|----------|----------------|-----------|
| C1-O3  | 1.256(7) | C2-C1-O3       | 122.2(5)  |
| C8-O1  | 1.326(7) | C2-C8-O1       | 114.7(5)  |
| C8-O2  | 1.204(7) | C2-C8-O2       | 123.7(5)  |
| S1-O21 | 1.458(4) | O1-C8-O2       | 121.6(5)  |
| S1-O22 | 1.459(4) | C22-C21-S1     | 122.7(4)  |
| S1-O23 | 1.450(4) | C7-N3-C9-C10   | -90.2(6)  |
|        |          | C1-C2-C8-O1    | -0.9(8)   |
|        |          | C1-C2-C8-O2    | 179.7(5)  |
|        |          | C23-C22-C21-S1 | -168.8(4) |

**Table S5.** Selected bond lengths (Å) and angles (°) for **4R**.

|        |          |                |           |
|--------|----------|----------------|-----------|
| C1-O3  | 1.259(6) | C2-C1-O3       | 123.0(4)  |
| C8-O1  | 1.322(6) | C2-C8-O1       | 115.1(4)  |
| C8-O2  | 1.212(6) | C2-C8-O2       | 123.3(5)  |
| S1-O21 | 1.462(4) | O1-C8-O2       | 121.6(4)  |
| S1-O22 | 1.458(4) | C22-C21-S1     | 122.5(4)  |
| S1-O23 | 1.447(4) | C7-N3-C9-C10   | 90.3(6)   |
|        |          | C1-C2-C8-O1    | 0.6(7)    |
|        |          | C1-C2-C8-O2    | -179.4(5) |
|        |          | C23-C22-C21-S1 | 168.8(4)  |

**Table S6.** Selected bond lengths (Å) and angles (°) for **5**.

|             |          |                  |          |
|-------------|----------|------------------|----------|
| C(1)-O(3)   | 1.284(5) | O(3)-C(1)-C(2)   | 126.2(4) |
| C(1)-C(2)   | 1.407(6) | O(3)-C(1)-C(6)   | 117.6(4) |
| C(1)-C(6)   | 1.439(5) | C(2)-C(1)-C(6)   | 116.2(4) |
| C(2)-C(3)   | 1.385(5) | C(3)-C(2)-C(1)   | 118.8(4) |
| C(2)-C(8)   | 1.489(5) | C(3)-C(2)-C(8)   | 117.4(4) |
| C(3)-N(3)   | 1.335(5) | C(1)-C(2)-C(8)   | 123.8(4) |
| C(4)-N(4)   | 1.331(5) | N(3)-C(3)-C(2)   | 124.5(4) |
| C(4)-N(2)   | 1.355(5) | N(4)-C(4)-N(2)   | 117.6(4) |
| C(4)-N(5)   | 1.364(5) | N(4)-C(4)-N(5)   | 126.6(4) |
| C(5)-N(5)   | 1.309(5) | N(2)-C(4)-N(5)   | 115.8(4) |
| C(5)-C(6)   | 1.380(5) | N(5)-C(5)-C(6)   | 124.8(4) |
| C(6)-C(7)   | 1.394(5) | C(5)-C(6)-C(7)   | 114.9(4) |
| C(7)-N(4)   | 1.334(5) | C(5)-C(6)-C(1)   | 123.3(4) |
| C(7)-N(3)   | 1.371(5) | C(7)-C(6)-C(1)   | 121.7(4) |
| C(8)-O(2)   | 1.235(5) | N(4)-C(7)-N(3)   | 117.4(3) |
| C(8)-O(1)   | 1.279(5) | N(4)-C(7)-C(6)   | 123.3(4) |
| C(9)-N(3)   | 1.487(5) | N(3)-C(7)-C(6)   | 119.3(3) |
| C(9)-C(10)  | 1.495(6) | O(2)-C(8)-O(1)   | 122.4(4) |
| C(11)-N(2)  | 1.454(5) | O(2)-C(8)-C(2)   | 118.8(4) |
| C(11)-C(12) | 1.510(6) | O(1)-C(8)-C(2)   | 118.8(4) |
| C(12)-N(1)  | 1.477(6) | N(3)-C(9)-C(10)  | 112.4(3) |
| C(13)-N(2)  | 1.461(6) | N(2)-C(11)-C(12) | 110.1(4) |

|              |          |                    |           |
|--------------|----------|--------------------|-----------|
| C(13)-C(14)  | 1.508(6) | N(1)-C(12)-C(11)   | 110.8(4)  |
| C(14)-N(1)   | 1.487(6) | N(2)-C(13)-C(14)   | 109.9(4)  |
| N(6)-O(4)    | 1.219(5) | N(1)-C(14)-C(13)   | 109.5(4)  |
| N(6)-O(5)    | 1.225(5) | C(12)-N(1)-C(14)   | 111.3(4)  |
| N(6)-O(6)    | 1.235(5) | C(4)-N(2)-C(11)    | 120.7(4)  |
| O(1)-Cu(1)   | 1.918(3) | C(4)-N(2)-C(13)    | 121.4(4)  |
| O(3)-Cu(1)   | 1.891(3) | C(11)-N(2)-C(13)   | 113.1(4)  |
| Cu(1)-O(3)#1 | 1.891(3) | C(3)-N(3)-C(7)     | 119.5(3)  |
| Cu(1)-O(1)#1 | 1.918(3) | C(3)-N(3)-C(9)     | 120.9(3)  |
|              |          | C(7)-N(3)-C(9)     | 119.2(3)  |
|              |          | C(4)-N(4)-C(7)     | 115.4(3)  |
|              |          | C(5)-N(5)-C(4)     | 114.9(4)  |
|              |          | O(4)-N(6)-O(5)     | 121.4(5)  |
|              |          | O(4)-N(6)-O(6)     | 120.5(5)  |
|              |          | O(5)-N(6)-O(6)     | 118.0(5)  |
|              |          | C(8)-O(1)-Cu(1)    | 131.3(3)  |
|              |          | C(1)-O(3)-Cu(1)    | 126.9(3)  |
|              |          | O(3)#1-Cu(1)-O(3)  | 180.0     |
|              |          | O(3)#1-Cu(1)-O(1)  | 87.45(12) |
|              |          | O(3)-Cu(1)-O(1)    | 92.55(12) |
|              |          | O(3)#1-Cu(1)-O(1)# | 92.55(12) |
|              |          | O(3)-Cu(1)-O(1)#1  | 87.45(12) |
|              |          | O(1)-Cu(1)-O(1)#1  | 180.0     |

Symmetry transformations used to generate equivalent atoms: #1-x,-y+2,-z+1

**Table S7.** Cremer-Pople  $\theta$  angle values [ $^{\circ}$ ] and puckering amplitudes  $Q$  [ $\text{\AA}$ ] of piperazine rings in **1-6**.

| Compound                    | $Q$ [ $\text{\AA}$ ]   | $\theta$ [ $^{\circ}$ ] |
|-----------------------------|------------------------|-------------------------|
| <b>1</b> ·2H <sub>2</sub> O | 0.5563(13)             | 176.64(13)              |
| <b>2</b>                    | 0.5678(17)             | 174.18(17)              |
| <b>3</b> ·5H <sub>2</sub> O | 0.5608(17), 0.5494(17) | 0.60(17), 177.94(17)    |
| <b>4S</b>                   | 0.561(6)               | 178.7(5)                |
| <b>4R</b>                   | 0.564(5)               | 3.4(5)                  |
| <b>5</b>                    | 0.566(5)               | 177.9(5)                |
| <b>6</b>                    | 0.570(6), 0.566(6)     | 163.7(6), 171.8(6)      |

## Powder X-ray diffraction data – bulk purity

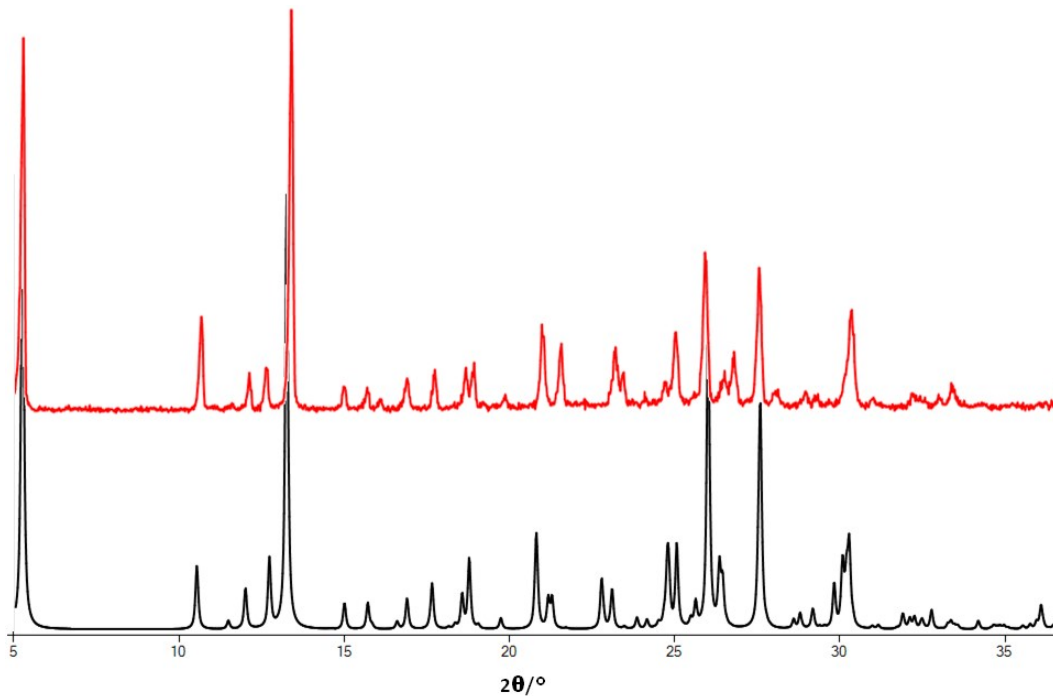

**Figure S6.** Experimental (red) and simulated (black) powder X-ray diffractograms of  $1 \cdot 2\text{H}_2\text{O}$ .

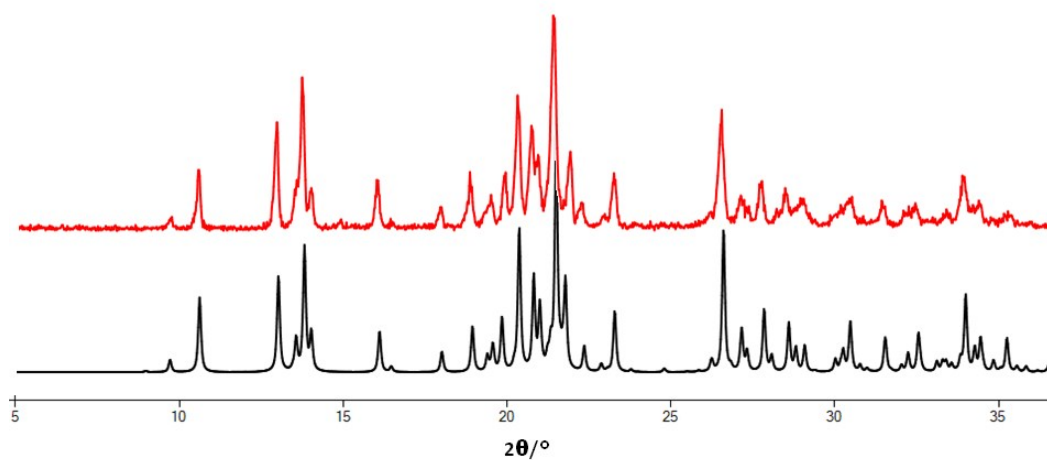

**Figure S7.** Experimental (red) and simulated (black) powder X-ray diffractograms of **2**.

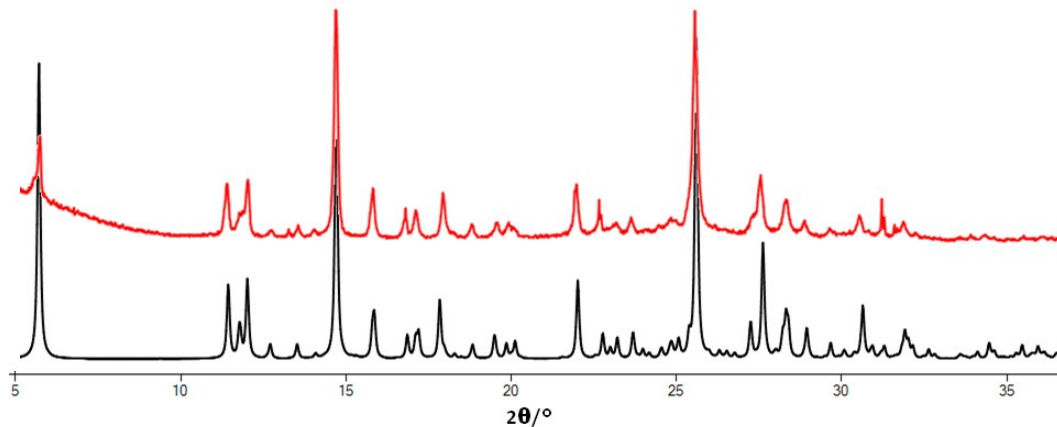

**Figure S8.** Experimental (red) and simulated (black) powder X-ray diffractograms of **3·5H<sub>2</sub>O**.

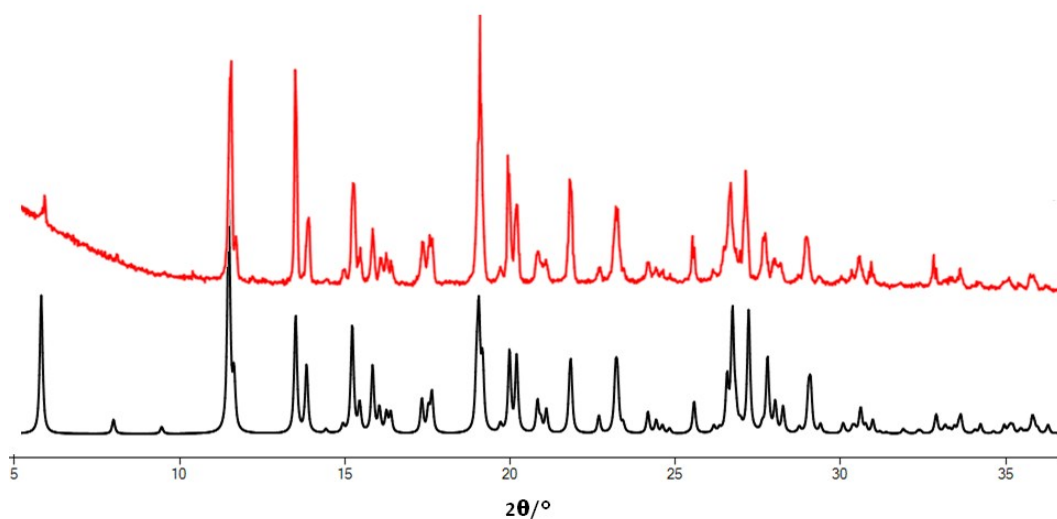

**Figure S9.** Experimental (red) and simulated (black) powder X-ray diffractograms of **4S**.

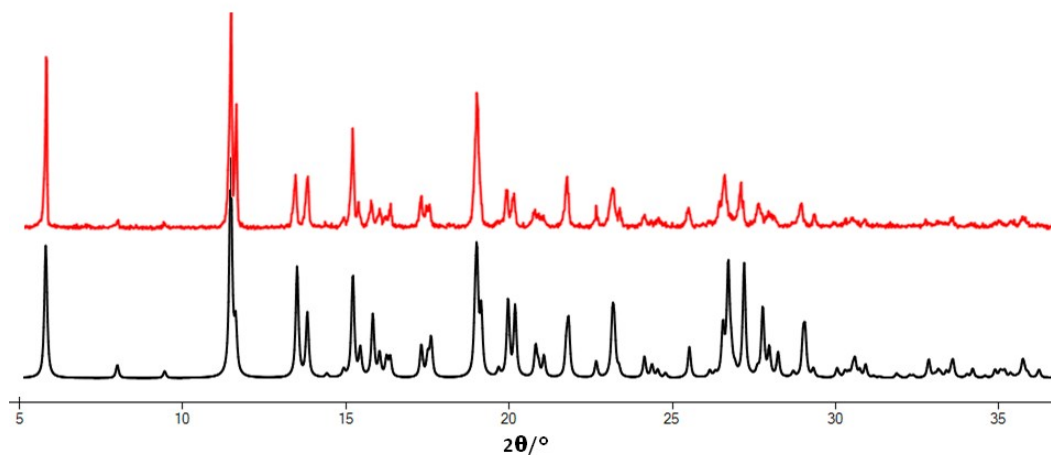

**Figure S10.** Experimental (red) and simulated (black) powder X-ray diffractograms of **4R**.



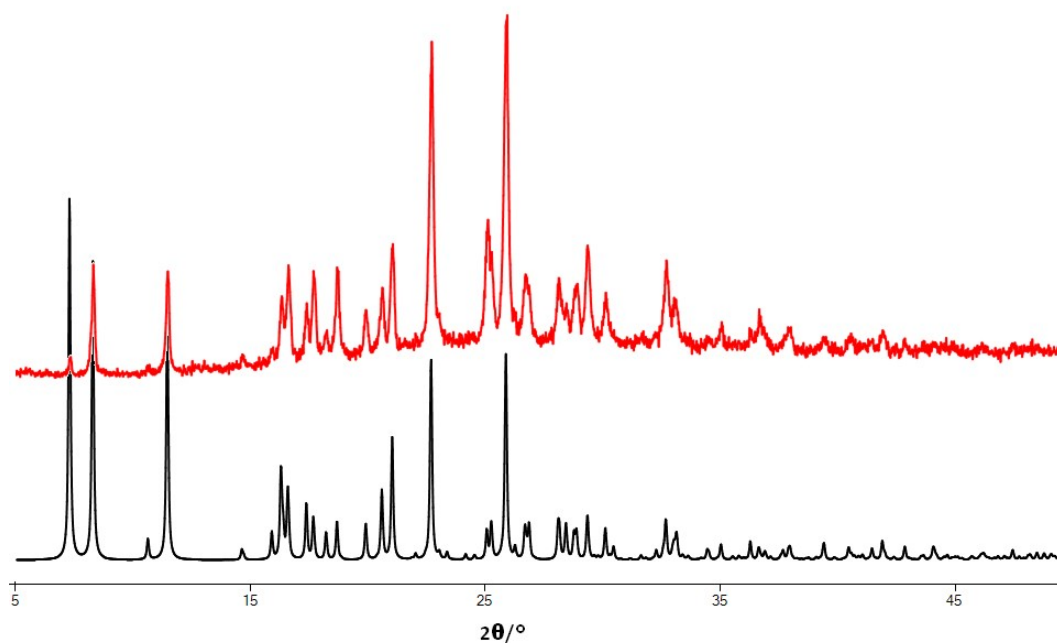

**Figure S11.** Experimental (red) and simulated (black) powder X-ray diffractograms of complex **5**.

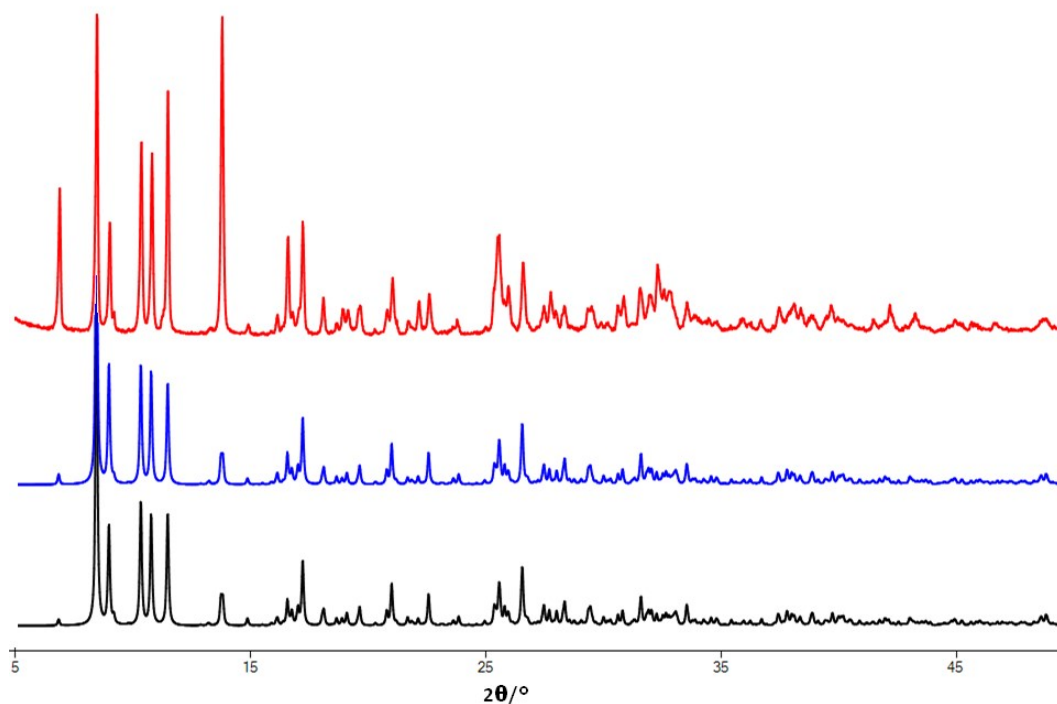

**Figure S12.** Experimental (red) and simulated powder X-ray (black- GIWNOR; blue- PICWUV) diffractograms of MOF **6**.

## Powder X-ray diffraction data – shelf stability

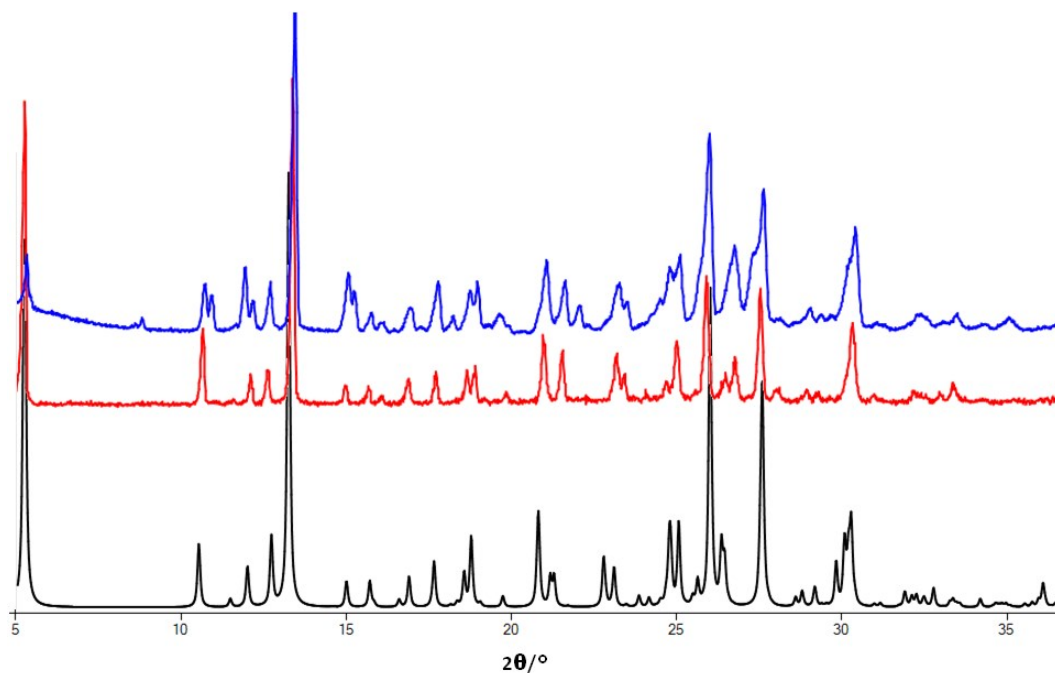

**Figure S13.** Simulated (black) and experimental (red) powder X-ray diffractograms of **1**·2H<sub>2</sub>O after 15 months (blue) on shelf at room temperature.

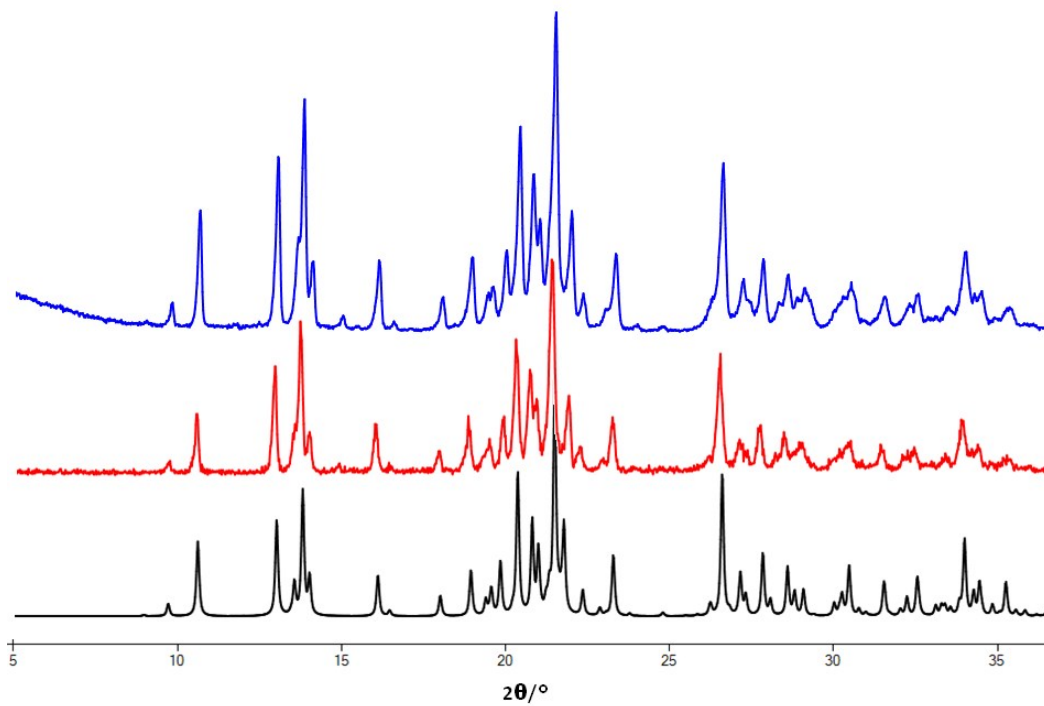

**Figure S14.** Simulated (black) and experimental (red) powder X-ray diffractograms of **2** after 15 months (blue) on shelf at room temperature.

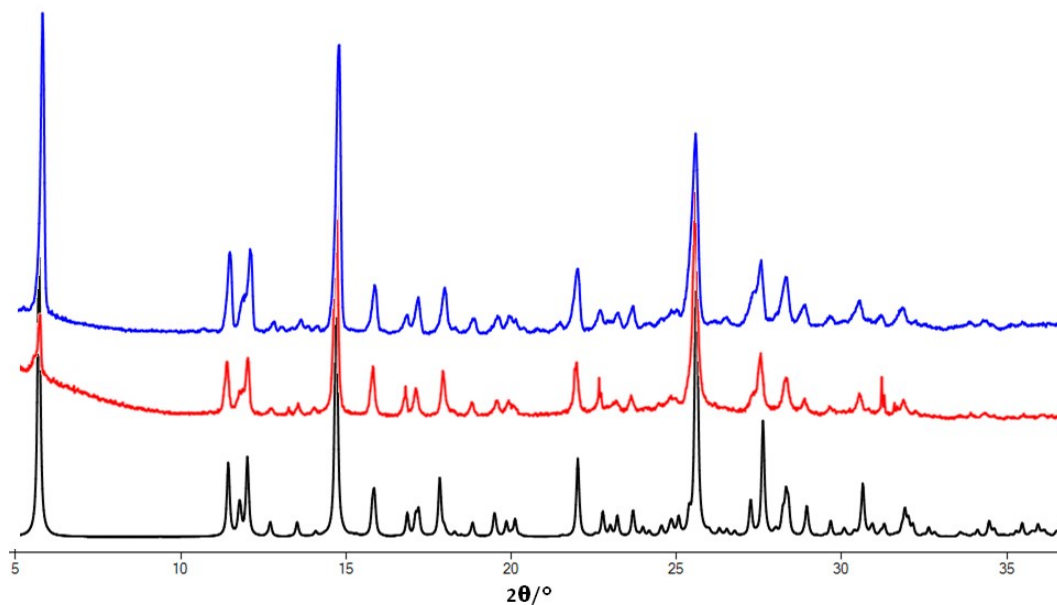

**Figure S15.** Simulated (black) and experimental (red) powder X-ray diffractograms of  $3 \cdot 5\text{H}_2\text{O}$  after 15 months (blue) on shelf at room temperature.

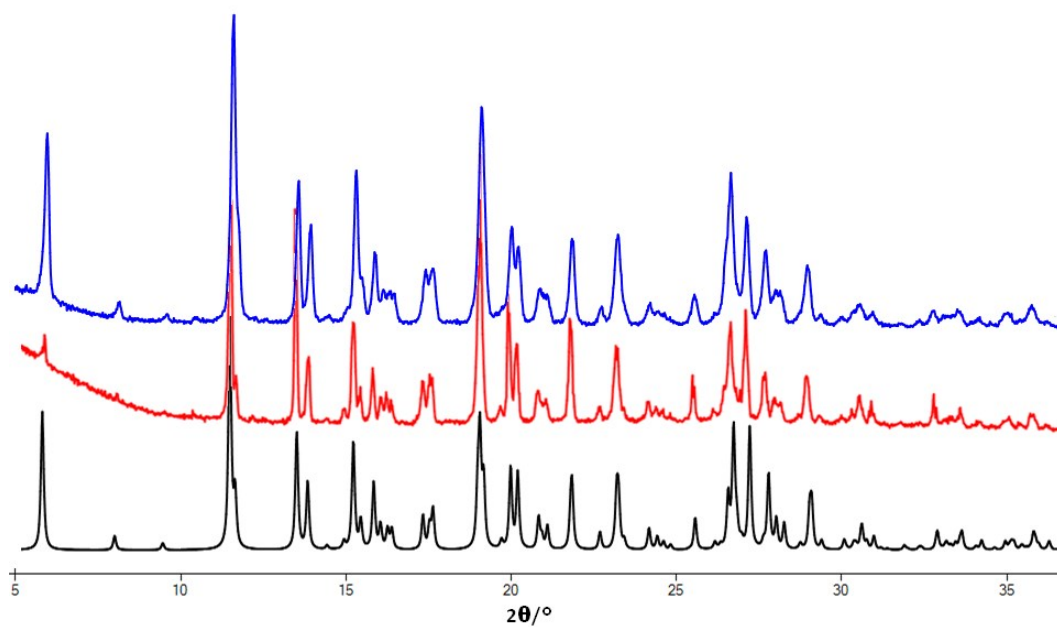

**Figure S16.** Simulated (black) and experimental (red) powder X-ray diffractograms of  $4\text{S}$  after 15 months (blue) on shelf at room temperature.

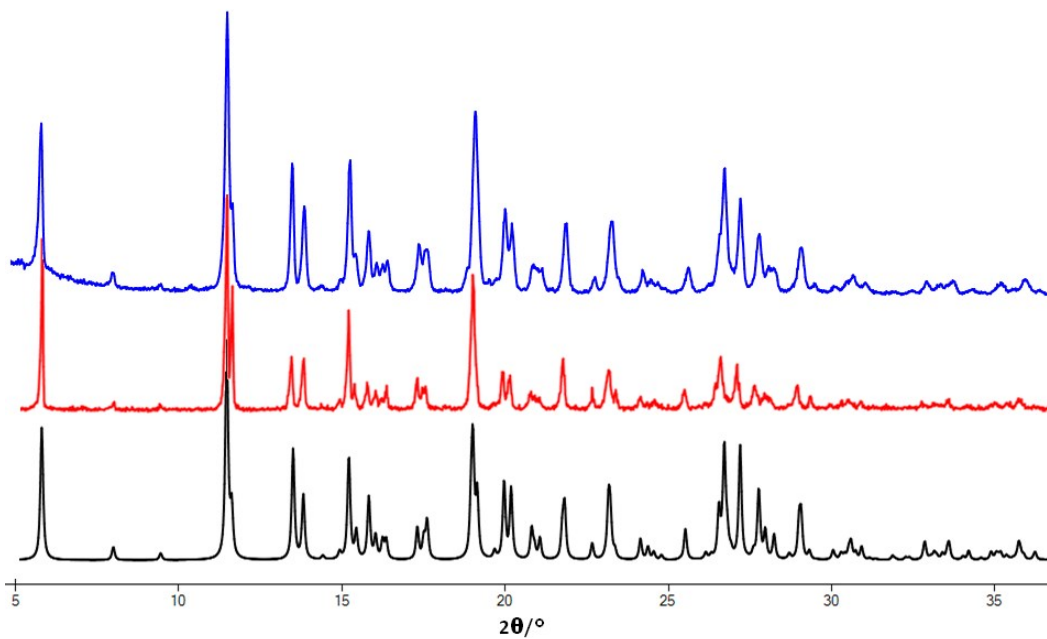

**Figure S17.** Simulated (black) and experimental (red) powder X-ray diffractograms of **4R** after 15 months (blue) on shelf at room temperature.

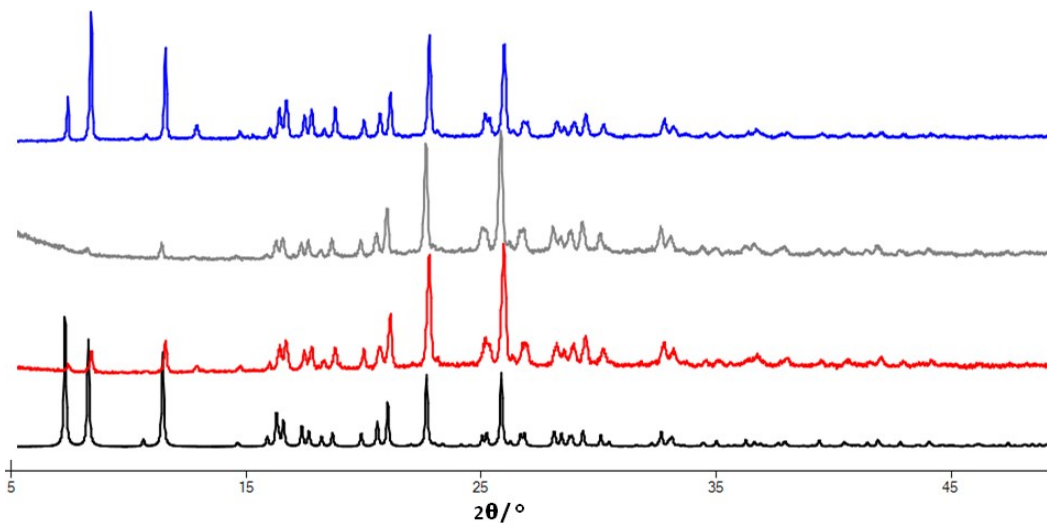

**Figure S18.** Simulated (black) and experimental (red) powder X-ray diffractograms of **5** after 8 (grey) and 15 (blue) months on shelf at room temperature.

## DSC and TGA data

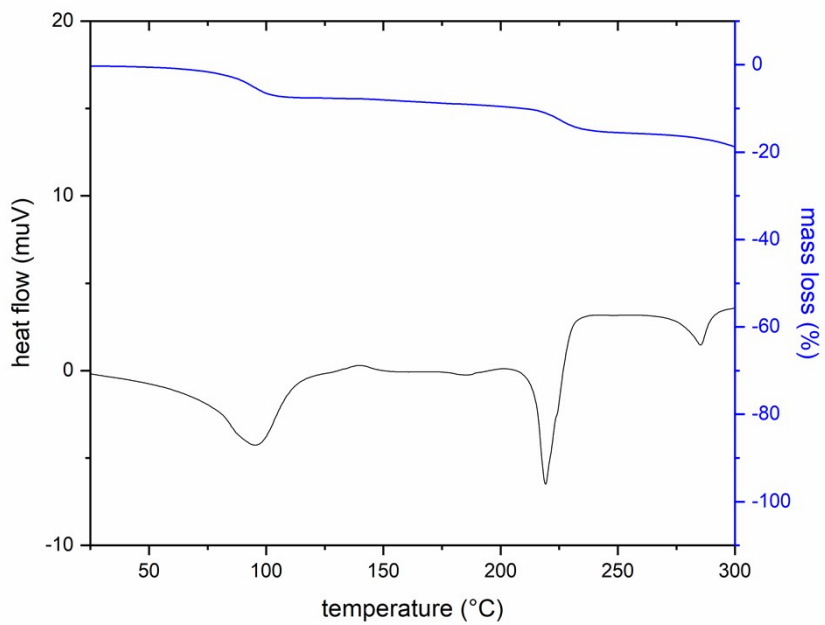

**Figure S19.** DSC and TGA data for 1·2H<sub>2</sub>O.

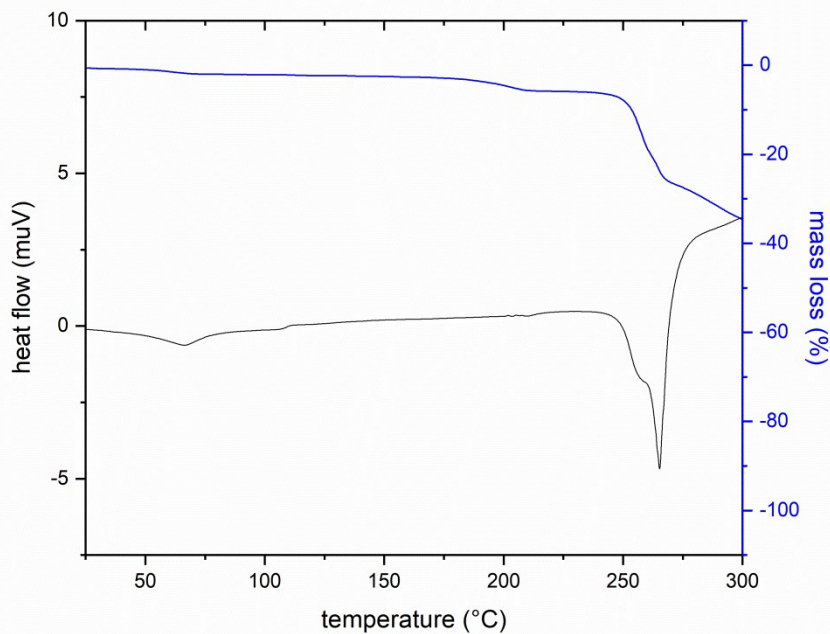

**Figure S20.** DSC and TGA data for 2.

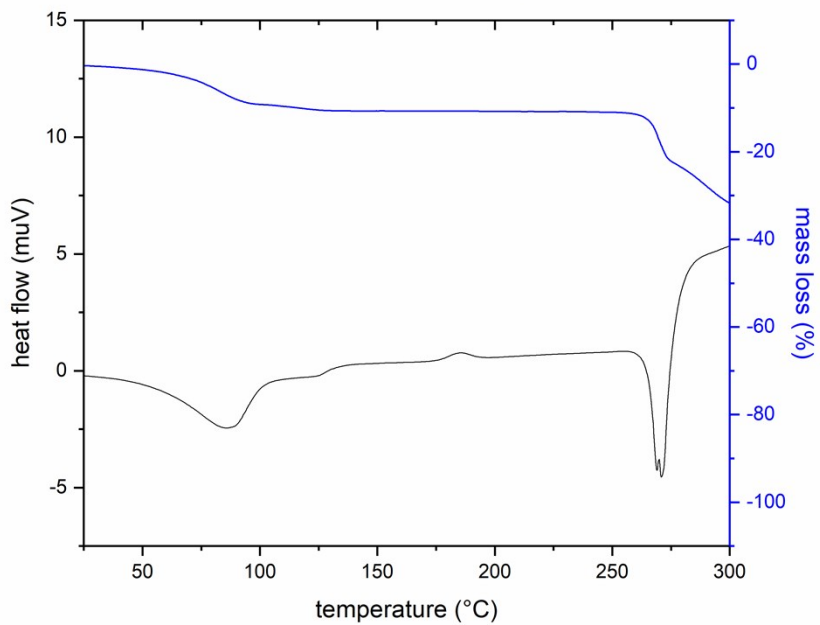

**Figure S21.** DSC and TGA data for  $3 \cdot 5H_2O$ .

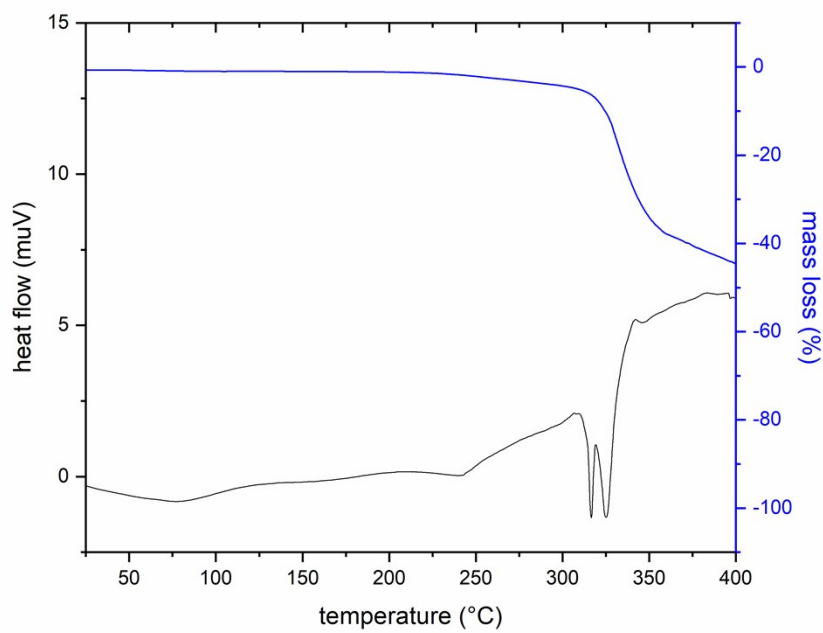

**Figure S22.** DSC and TGA data for 4S.

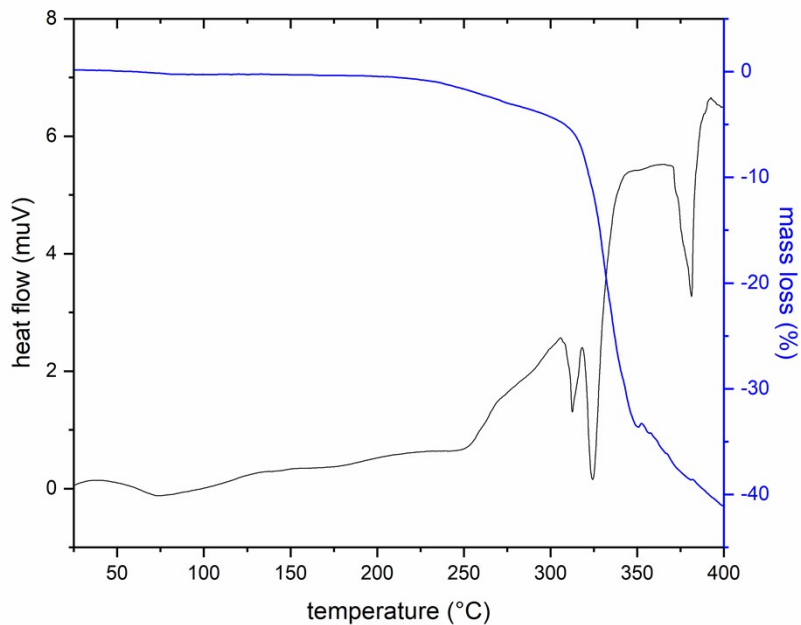

**Figure S23.** DSC and TGA data for **4R**.

### Hot-stage microscopy data

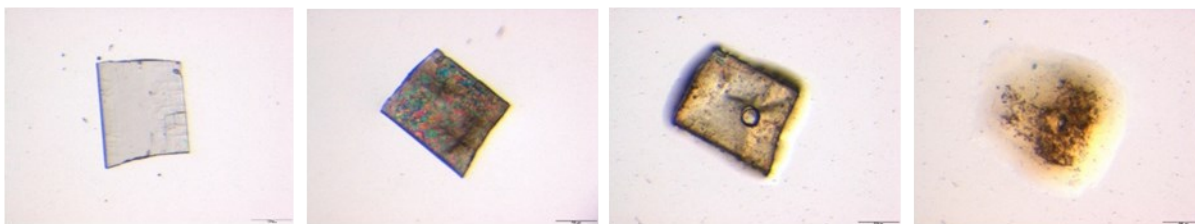

**Figure S24.** Hot-stage images for **1·2H<sub>2</sub>O** (pipemidic glycolate dihydrate) at 23, 98, 219 and 237°C (from left to right).

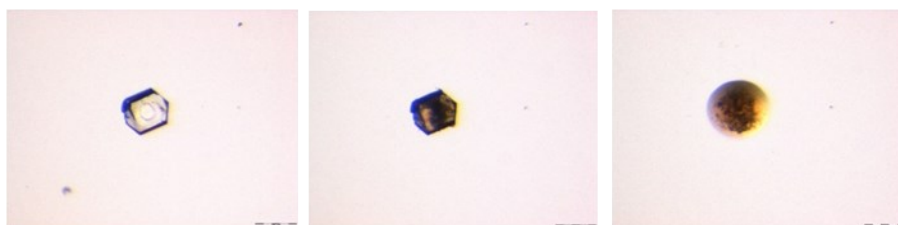

**Figure S25.** Hot-stage images for **2** (pipemidic hydrogenoxalate) at 23, 252 and 272°C (from left to right).



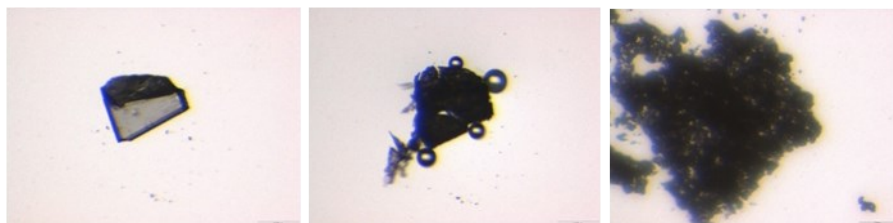

**Figure S26.** Hot-stage images for **3**·5H<sub>2</sub>O (pipemidic hydrogenoxalate pentahydrate) at 21, 100 and 210°C (from left to right).

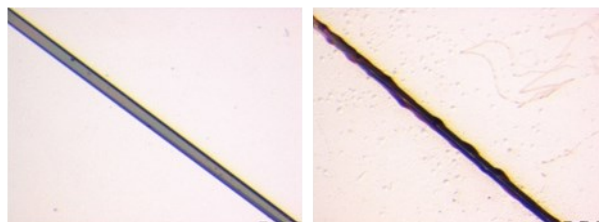

**Figure S27.** Hot-stage images for **4S** (*S*)-camphorsulfonate salt) at 23 and 325°C (from left to right).

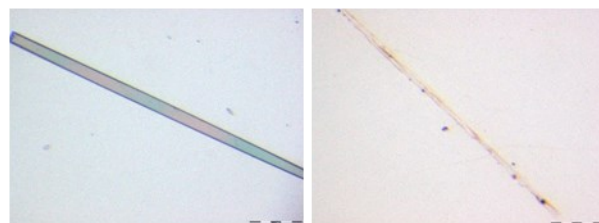

**Figure S28.** Hot-stage images for **4R** (*R*)-camphorsulfonate salt) at 23 and 320°C (from left to right).

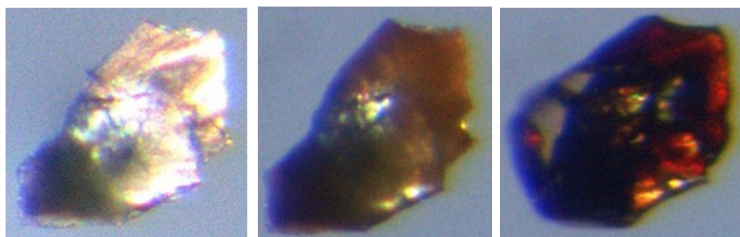

**Figure S29.** Hot-stage images for **5** at 25, 230 and 298°C (from left to right).



## FTIR data

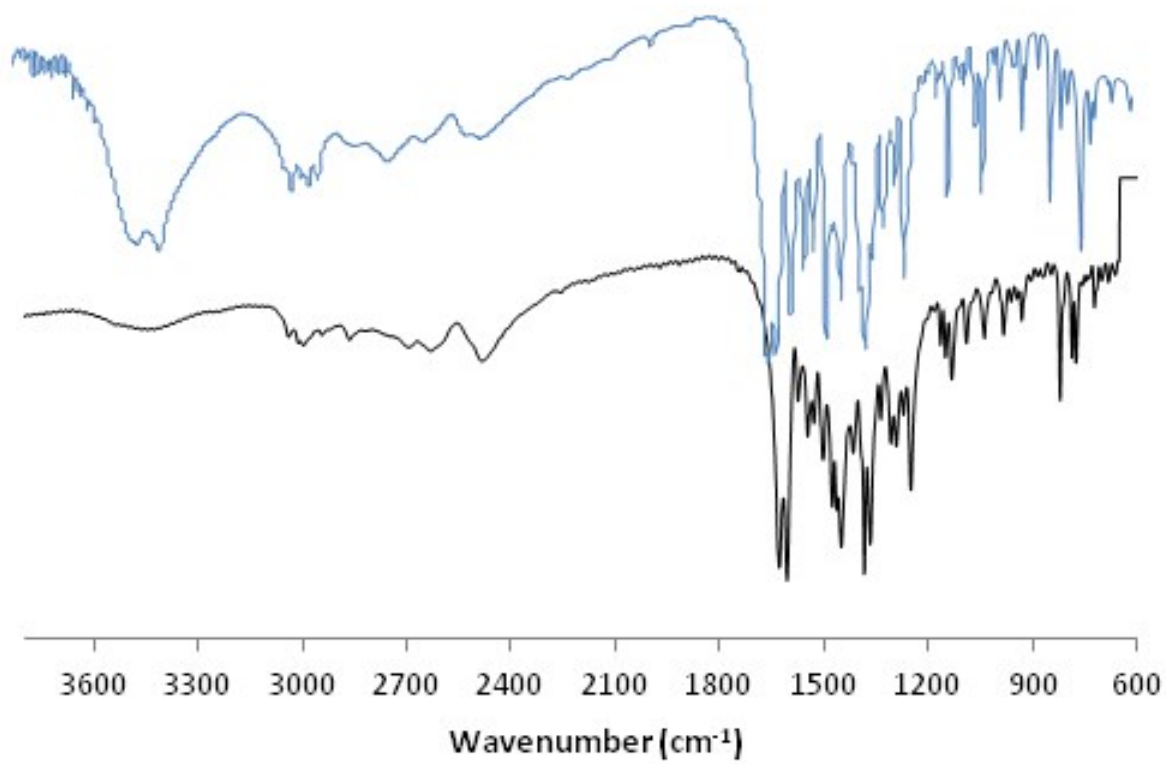

**Figure S30.** Fourier-transform infrared (FTIR) spectra in KBr pellets of **5** (black) and pipemidic acid (blue).
